# Supplementary material for: Total observed error, total allowable error, and QC rules for canine serum and urine cortisol achievable with the Immulite 2000 Xpi cortisol immunoassay
Source: PubMed Central journal article supplement — J Vet Diagn Invest. 2022 Mar 9;34(2):246–57. doi: 10.1177/10406387221076129 (PMC8921817; doi:10.1177/10406387221076129), 2022-03-09
Supplement: sj-pdf-1-vdi-10.1177_10406387221076129.pdf [file sj-pdf-1-vdi-10.1177_10406387221076129.pdf]

Korchia J, Freeman KP. Total observable error, total allowable error, and QC rules for canine serum and urine cortisol achievable with the Immulite 2000 Xpi cortisol immunoassay

**Supplemental Tables 1, 2.** Results from canine serum<sup>1</sup> and canine urine<sup>2</sup> cortisol validation studies, used in our study: QC rule validation by the classical approach (Fig. 2A) for 2 cortisol concentrations (L4 = 38.6 nmol/L [1.4 µg/dL]; L8 = 552 nmol/L [20 µg/dL]) and both QCM levels in canine serum and canine urine.

We investigated the sigma metric and the candidate QC rules at “low” TEa and “high” TEa (see materials and methods). The goal was to illustrate the large influence of varying TEa on candidate QC rules. Similarly, we investigated the candidate QC rules at “low” P<sub>ed</sub> (arbitrarily chosen at 50%, even if such a low P<sub>ed</sub> is undesirable) and at “high” P<sub>ed</sub> (chosen at the minimum level of 90%). The goal was to illustrate the limited influence of varying P<sub>ed</sub> on candidate QC rules. **Bold** QC rules are those newly accepted when moving from high to low P<sub>ed</sub> and/or from low to high TEa.

Table abbreviations: AB = average bias; All = includes all 4 QC rules (1<sub>2s</sub>, 1 2.5<sub>s</sub>, 1<sub>3s</sub>, 1<sub>3s</sub>/2<sub>2s</sub>/R<sub>4s</sub>); L4 = cortisol concentration of 38.6 nmol/L (1.4 µg/dL); L8 = cortisol concentration of 552 nmol/L (20 µg/dL); P<sub>ed</sub> = probability of error detection (by the QCM); QCM = quality control material; RB = range-based bias; SR = spiking-recovery bias; TEa = total allowable error; TEo = observed total error.

**Supplemental Table 1.** QC rule validation by the classical approach in canine serum cortisol.

| Serum cortisol | High P <sub>ed</sub> (P <sub>ed</sub> 90%) |         |         |            |                                                                                      | Low P <sub>ed</sub> (P <sub>ed</sub> 50%) |         |         |      |                                                                                                      |
|----------------|--------------------------------------------|---------|---------|------------|--------------------------------------------------------------------------------------|-------------------------------------------|---------|---------|------|------------------------------------------------------------------------------------------------------|
|                | Level                                      | TEo (%) | TEa (%) | σ          | Candidate QC rule                                                                    | Level                                     | TEo (%) | TEa (%) | σ    | Candidate QC rule                                                                                    |
| Low TEa        | L4 <sub>(SR)</sub>                         | 25.6    | 33      | 2.8        | None                                                                                 | L4 <sub>(SR)</sub>                        | 25.6    | 33      | 2.8  | None                                                                                                 |
|                | L4 <sub>(RB)</sub>                         | 32.8    | 33      | 2.0        | None                                                                                 | L4 <sub>(RB)</sub>                        | 32.8    | 33      | 2.0  | None                                                                                                 |
|                | L4 <sub>(AB)</sub>                         | 22.0    | 33      | 3.2        | None                                                                                 | L4 <sub>(AB)</sub>                        | 22.0    | 33      | 3.2  | <b>1<sub>2s</sub></b>                                                                                |
|                | L8 <sub>(SR)</sub>                         | 17.9    | 20      | 2.3        | None                                                                                 | L8 <sub>(SR)</sub>                        | 17.9    | 20      | 2.3  | None                                                                                                 |
|                | L8 <sub>(RB)</sub>                         | 19.3    | 20      | 2.1        | None                                                                                 | L8 <sub>(RB)</sub>                        | 19.3    | 20      | 2.1  | None                                                                                                 |
|                | L8 <sub>(AB)</sub>                         | 17.8    | 20      | 2.3        | None                                                                                 | L8 <sub>(AB)</sub>                        | 17.8    | 20      | 2.3  | None                                                                                                 |
|                | QCM1                                       | 8.5     | 20      | 4.8        | <b>1<sub>2s</sub>; 1<sub>2.5s</sub>; 1<sub>3s</sub>/2<sub>s</sub>/R<sub>4s</sub></b> | QCM1                                      | 8.5     | 20      | 4.8  | <b>All</b>                                                                                           |
|                | QCM2                                       | 14.5    | 20      | 2.8        | None                                                                                 | QCM2                                      | 14.5    | 20      | 2.8  | None                                                                                                 |
| High TEa       | Level                                      | TEo (%) | TEa (%) | σ          | Candidate QC rule                                                                    | Level                                     | TEo (%) | TEa (%) | σ    | Candidate QC rule                                                                                    |
|                | L4 <sub>(SR)</sub>                         | 25.6    | 50      | 4.6        | <b>1<sub>2s</sub></b>                                                                | L4 <sub>(SR)</sub>                        | 25.6    | 50      | 4.6  | <b>1<sub>2s</sub>; 1<sub>2.5s</sub>; 1<sub>3s</sub>/2<sub>s</sub>/R<sub>4s</sub>; 1<sub>3s</sub></b> |
|                | L4 <sub>(RB)</sub>                         | 32.8    | 50      | 3.8        | None                                                                                 | L4 <sub>(RB)</sub>                        | 32.8    | 50      | 3.8  | <b>1<sub>2s</sub>; 1<sub>2.5s</sub></b>                                                              |
|                | L4 <sub>(AB)</sub>                         | 22.0    | 50      | 4.9        | <b>1<sub>2s</sub>; 1<sub>2.5s</sub>; 1<sub>3s</sub>/2<sub>s</sub>/R<sub>4s</sub></b> | L4 <sub>(AB)</sub>                        | 22.0    | 50      | 4.9  | <b>All</b>                                                                                           |
|                | L8 <sub>(SR)</sub>                         | 17.9    | 50      | 6.3        | <b>All</b>                                                                           | L8 <sub>(SR)</sub>                        | 17.9    | 50      | 6.3  | All                                                                                                  |
|                | L8 <sub>(RB)</sub>                         | 19.3    | 50      | 6.1        | <b>All</b>                                                                           | L8 <sub>(RB)</sub>                        | 19.3    | 50      | 6.1  | All                                                                                                  |
|                | L8 <sub>(AB)</sub>                         | 17.8    | 50      | 6.3        | <b>All</b>                                                                           | L8 <sub>(AB)</sub>                        | 17.8    | 50      | 6.3  | All                                                                                                  |
|                | QCM1                                       | 8.5     | 50      | 12.1       | <b>All</b>                                                                           | QCM1                                      | 8.5     | 50      | 12.1 | All                                                                                                  |
| QCM2           | 14.5                                       | 50      | 7.1     | <b>All</b> | QCM2                                                                                 | 14.5                                      | 50      | 7.1     | All  |                                                                                                      |

**Supplemental Table 2.** QC rule validation by the classical approach in canine urine cortisol.

| Urine cortisol       | High P <sub>ed</sub> (P <sub>ed</sub> 90%) |         |         |            |                                                                                       | Low P <sub>ed</sub> (P <sub>ed</sub> 50%) |         |         |      |                                                                                                       |
|----------------------|--------------------------------------------|---------|---------|------------|---------------------------------------------------------------------------------------|-------------------------------------------|---------|---------|------|-------------------------------------------------------------------------------------------------------|
|                      | Level                                      | TEo (%) | TEa (%) | σ          | Candidate QC rule                                                                     | Level                                     | TEo (%) | TEa (%) | σ    | Candidate QC rule                                                                                     |
| Low TEa              | L4 <sub>(SR)</sub>                         | 61.4    | 61.4    | 2          | None                                                                                  | L4 <sub>(SR)</sub>                        | 61.4    | 61.4    | 2    | None                                                                                                  |
|                      | L4 <sub>(RB)</sub>                         | 27.8    | 33      | 2.5        | None                                                                                  | L4 <sub>(RB)</sub>                        | 27.8    | 33      | 2.5  | None                                                                                                  |
|                      | L4 <sub>(AB)</sub>                         | 20.2    | 33      | 3.3        | None                                                                                  | L4 <sub>(AB)</sub>                        | 20.2    | 33      | 3.3  | <b>1<sub>2s</sub></b>                                                                                 |
|                      | L8 <sub>(SR)</sub>                         | 28.9    | 28.9    | 2          | None                                                                                  | L8 <sub>(SR)</sub>                        | 28.9    | 28.9    | 2    | None                                                                                                  |
|                      | L8 <sub>(RB)</sub>                         | 19.9    | 20      | 2.0        | None                                                                                  | L8 <sub>(RB)</sub>                        | 19.9    | 20      | 2.0  | None                                                                                                  |
|                      | L8 <sub>(AB)</sub>                         | 10.3    | 20      | 4.1        | <b>1<sub>2s</sub></b>                                                                 | L8 <sub>(AB)</sub>                        | 10.3    | 20      | 4.1  | <b>1<sub>2s</sub>, 1<sub>2.5s</sub>, 1<sub>3s</sub>/2<sub>2s</sub>/R<sub>4s</sub>, 1<sub>3s</sub></b> |
|                      | QCM1 <sub>(SR)</sub>                       | 46.6    | 46.6    | 2          | None                                                                                  | QCM1 <sub>(SR)</sub>                      | 46.6    | 46.6    | 2    | None                                                                                                  |
|                      | QCM1 <sub>(RB)</sub>                       | 19.5    | 20      | 2.1        | None                                                                                  | QCM1 <sub>(RB)</sub>                      | 19.5    | 20      | 2.1  | None                                                                                                  |
|                      | QCM1 <sub>(AB)</sub>                       | 11.9    | 20      | 3.5        | None                                                                                  | QCM1 <sub>(AB)</sub>                      | 11.9    | 20      | 3.5  | <b>1<sub>2s</sub>, 1<sub>2.5s</sub></b>                                                               |
|                      | QCM2 <sub>(SR)</sub>                       | 28.7    | 28.7    | 2          | None                                                                                  | QCM2 <sub>(SR)</sub>                      | 28.7    | 28.7    | 2    | None                                                                                                  |
|                      | QCM2 <sub>(RB)</sub>                       | 19.7    | 20      | 2.1        | None                                                                                  | QCM2 <sub>(RB)</sub>                      | 19.7    | 20      | 2.1  | None                                                                                                  |
|                      | QCM2 <sub>(AB)</sub>                       | 10.1    | 20      | 4.2        | <b>1<sub>2s</sub></b>                                                                 | QCM2 <sub>(AB)</sub>                      | 10.1    | 20      | 4.2  | <b>1<sub>2s</sub>, 1<sub>2.5s</sub>, 1<sub>3s</sub>/2<sub>2s</sub>/R<sub>4s</sub>, 1<sub>3s</sub></b> |
| High TEa             | Level                                      | TEo (%) | TEa (%) | σ          | Candidate QC rule                                                                     | Level                                     | TEo (%) | TEa (%) | σ    | Candidate QC rule                                                                                     |
|                      | L4 <sub>(SR)</sub>                         | 61.4    | 61.4    | 2          | None                                                                                  | L4 <sub>(SR)</sub>                        | 61.4    | 61.4    | 2    | None                                                                                                  |
|                      | L4 <sub>(RB)</sub>                         | 27.8    | 50      | 4.3        | <b>1<sub>2s</sub></b>                                                                 | L4 <sub>(RB)</sub>                        | 27.8    | 50      | 4.3  | <b>1<sub>2s</sub>, 1<sub>2.5s</sub>, 1<sub>3s</sub>/2<sub>2s</sub>/R<sub>4s</sub>, 1<sub>3s</sub></b> |
|                      | L4 <sub>(AB)</sub>                         | 20.2    | 50      | 5.1        | <b>1<sub>2s</sub>, 1<sub>2.5s</sub>, 1<sub>3s</sub>/2<sub>2s</sub>/R<sub>4s</sub></b> | L4 <sub>(AB)</sub>                        | 20.2    | 50      | 5.1  | <b>All</b>                                                                                            |
|                      | L8 <sub>(SR)</sub>                         | 28.9    | 50      | 6.6        | <b>All</b>                                                                            | L8 <sub>(SR)</sub>                        | 28.9    | 50      | 6.6  | All                                                                                                   |
|                      | L8 <sub>(RB)</sub>                         | 19.9    | 50      | 8.5        | <b>All</b>                                                                            | L8 <sub>(RB)</sub>                        | 19.9    | 50      | 8.5  | All                                                                                                   |
|                      | L8 <sub>(AB)</sub>                         | 10.3    | 50      | 10.6       | <b>All</b>                                                                            | L8 <sub>(AB)</sub>                        | 10.3    | 50      | 10.6 | All                                                                                                   |
|                      | QCM1 <sub>(SR)</sub>                       | 46.6    | 50      | 2.6        | None                                                                                  | QCM1 <sub>(SR)</sub>                      | 46.6    | 50      | 2.6  | None                                                                                                  |
| QCM1 <sub>(RB)</sub> | 19.5                                       | 50      | 7.6     | <b>All</b> | QCM1 <sub>(RB)</sub>                                                                  | 19.5                                      | 50      | 7.6     | All  |                                                                                                       |

Total allowable error for cortisol in dogs

|                      |      |    |      |     |                      |      |    |      |     |
|----------------------|------|----|------|-----|----------------------|------|----|------|-----|
| QCM1 <sub>(AB)</sub> | 11.9 | 50 | 9.1  | All | QCM1 <sub>(AB)</sub> | 11.9 | 50 | 9.1  | All |
| QCM2 <sub>(SR)</sub> | 28.7 | 50 | 6.7  | All | QCM2 <sub>(SR)</sub> | 28.7 | 50 | 6.7  | All |
| QCM2 <sub>(RB)</sub> | 19.7 | 50 | 8.7  | All | QCM2 <sub>(RB)</sub> | 19.7 | 50 | 8.7  | All |
| QCM2 <sub>(AB)</sub> | 10.1 | 50 | 10.9 | All | QCM2 <sub>(AB)</sub> | 10.1 | 50 | 10.9 | All |

**References**

1. Korchia J, Freeman KP. Validation study of canine serum cortisol measurement with the Immulite 2000 Xpi cortisol immunoassay. J Vet Diagn Invest 2021;33:844–863.
2. Korchia J, Freeman KP. Validation study of canine urine cortisol measurement with the Immulite 2000 Xpi cortisol immunoassay. J Vet Diagn Invest 2021;33:1052–1068.
